# Supplementary material
Source: MDPI journal article supplement (https://www.mdpi.com/2673-964X/3/2/8)
Supplement: s1 [file s1]

**Table S1.** Measurements of salinity in the interstitial water of sediments with the presence of *Rhizophora mangle* and *Laguncularia racemosa* in the Piraquê-Mirim, São Mateus and Caravelas estuaries.

| Salinity (psu) |                          |                              |
|----------------|--------------------------|------------------------------|
|                | <i>Rhizophora mangle</i> | <i>Laguncularia racemosa</i> |
| Piraquê-Mirim  | 22.9                     | 20.4                         |
| São Mateus     | 13.5                     | 9.5                          |
| Caravelas      | 25.9                     | 23.8                         |
